# Supplementary material for: The FOXJ1 target Cfap206 is required for sperm motility, mucociliary clearance of the airways and brain development
Source: Oxford University Press journal article supplement (doi:10.1242/dev.188052), 2020-01-01
Supplement: dev188052supp.pdf [file dev188052supp.pdf]

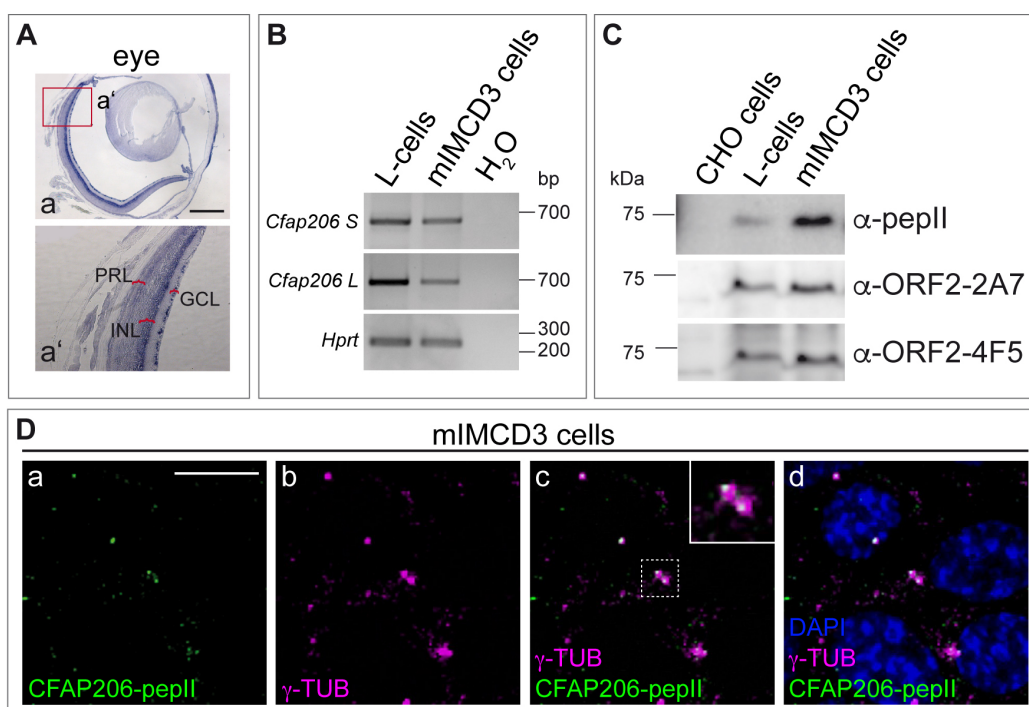

**Fig. S1. Cfap206 expression in mouse cells or cell lines forming primary cilia.** (A) *In situ* hybridisation on adult mouse eye section. Boxed area in (a) indicates the region shown at higher magnification in (a'). PRL: photoreceptor layer; INL: inner nuclear layer; GCL: ganglion cell layer. (B) RT-PCR on RNA isolated from murine L- and mIMCD3 cells, respectively, indicating that both transcripts were present. The full-size agarose gel is shown in Fig. S8. (C) Detection of endogenous CFAP206 protein by western blot analyses of lysates of murine L- and mIMCD3 cells. Lysates of CHO cells were used as negative control. (D) Localisation of endogenous CFAP206 ( $\alpha$ -pepII) protein to basal bodies/centrosomes of mIMCD3 cells co-stained with gamma-Tubulin ( $\gamma$ -TUB) (a-d). Box with dotted line in c is magnified in the inset. Scale bars: A = 500  $\mu$ m; D = 10  $\mu$ m.

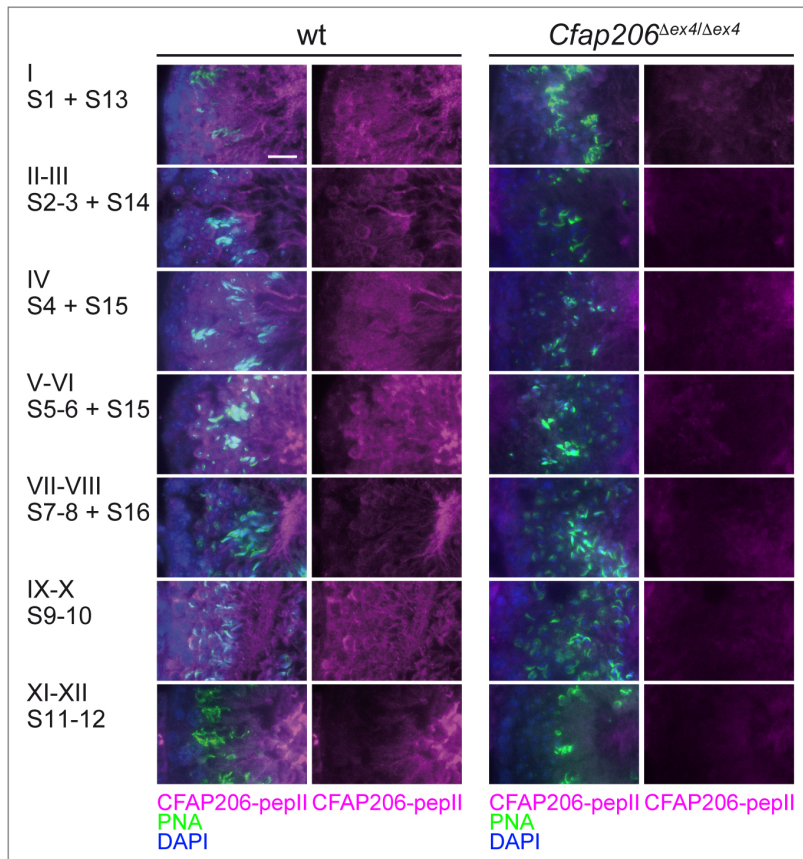

**Fig. S2. CFAP206 distribution in wild type and *Cfap206*<sup>Δex4/Δex4</sup> mouse spermatids.**

Sections of methanol fixed wild type and mutant testis, stained for acrosomes (PNA; green), nuclei (DAPI; blue) and CFAP206 ( $\alpha$ -pepII; magenta). S1-S16 indicate the stage of spermatogenesis, I-XII the stages of the epithelial cycle. Lumen of the sectioned seminiferous tubules is oriented to the right. Scale bar: 20  $\mu$ m.

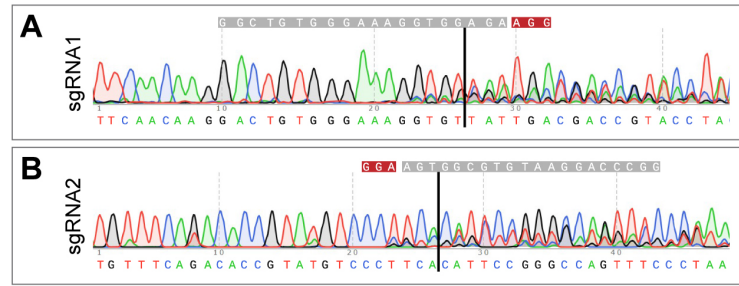

**Fig. S3. Genome editing of the *cfap206* locus in *Xenopus*.** (A) Sequence of *cfap206* L-allele of genome edited specimens injected with sgRNA1, which targeted exon 5. (B) Sequence of *cfap206* L-allele of genome edited specimens injected with sgRNA2, which targeted exon 2.

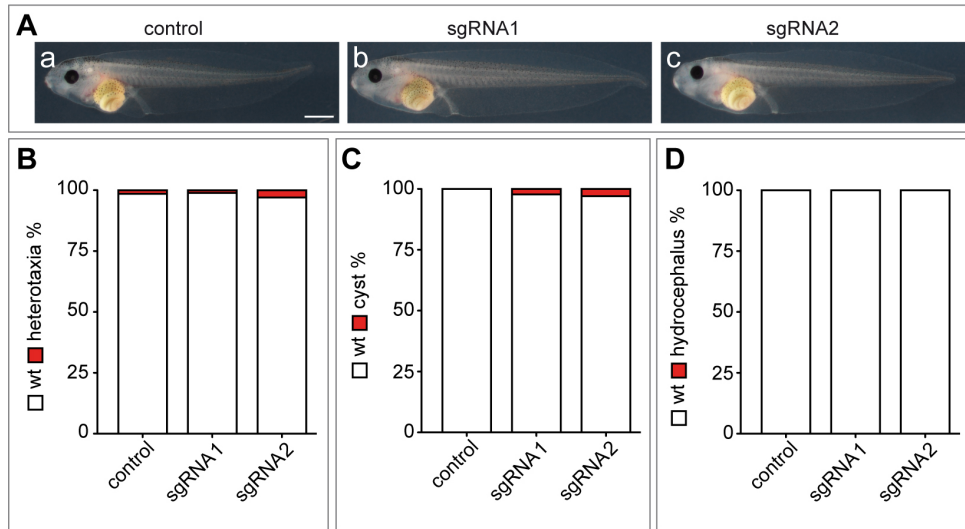

**Fig. S4. Analysis of organ situs, cysts and hydrocephalus in stage 45 wild type and *cfap206* crispant tadpoles.**

(A) Representative wild type (a), sgRNA1 crispant (b) and sgRNA2 crispant (c) tadpoles at stage 45. (B) Organ situs. (C) Cysts. (D) Hydrocephalus. Note that no significant deviations from wild type specimens were recorded for either potential ciliary phenotype. Scale bar: 1 mm.

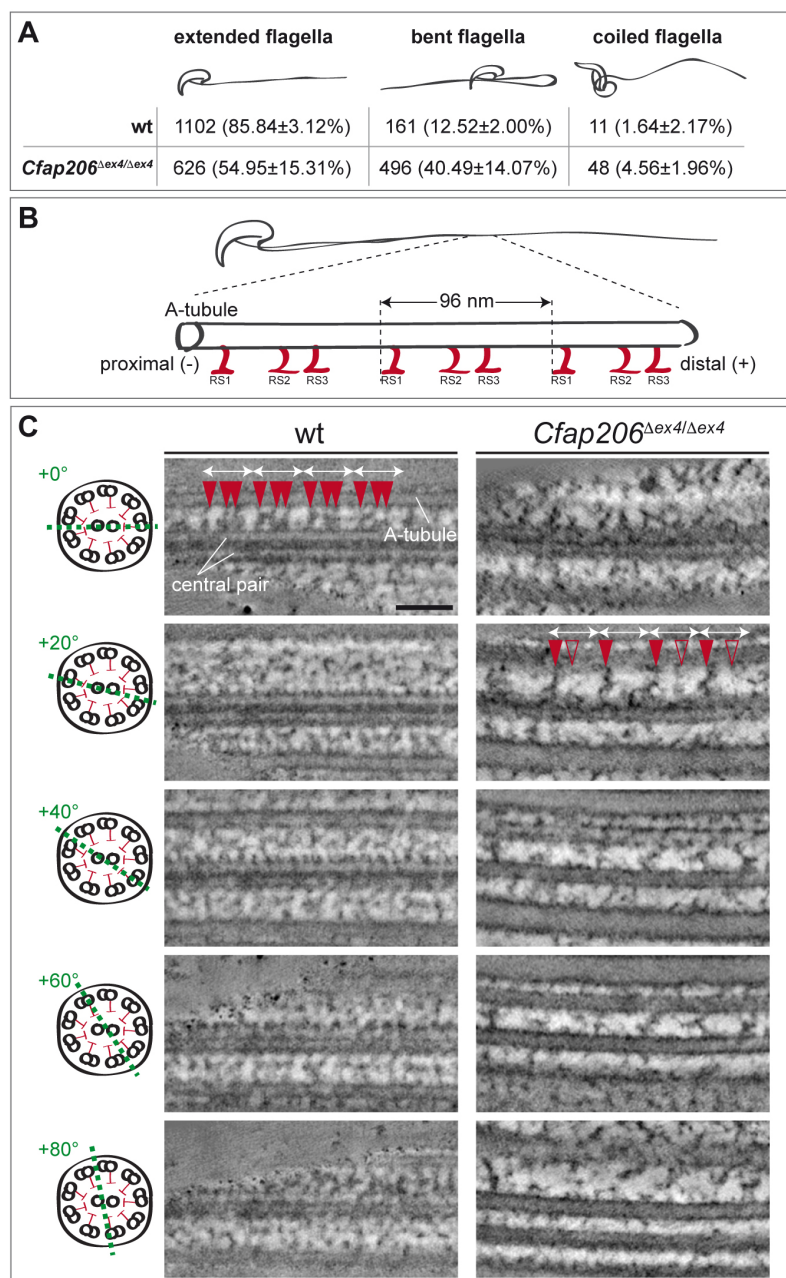

**Fig. S5. Phenotypic and electron tomographic analysis of wild type and *Cfap206*<sup>Δex4/Δex4</sup> mutant sperm.**

(A) Distribution of sperm phenotypes in wild type and *Cfap206*<sup>Δex4/Δex4</sup> mutants. (B) Schematic representation of mouse sperm and localisation of the radial spokes (RS1, 2, 3; red hooks) at the A-tubule of axonemal tubulin doublets. (C) Electron tomography revealed RS in wild type (left) at A-tubule of outer doublets pointing to inner central pair of microtubules. Rotation of section plane along long axis of inner central pair of microtubules revealed alternating appearance of RS above and below inner central pair of microtubules at every 20° in wild type. Note absence of regular RS pattern in *Cfap206*<sup>Δex4/Δex4</sup> mutant (right). Scale bar: 100 nm.

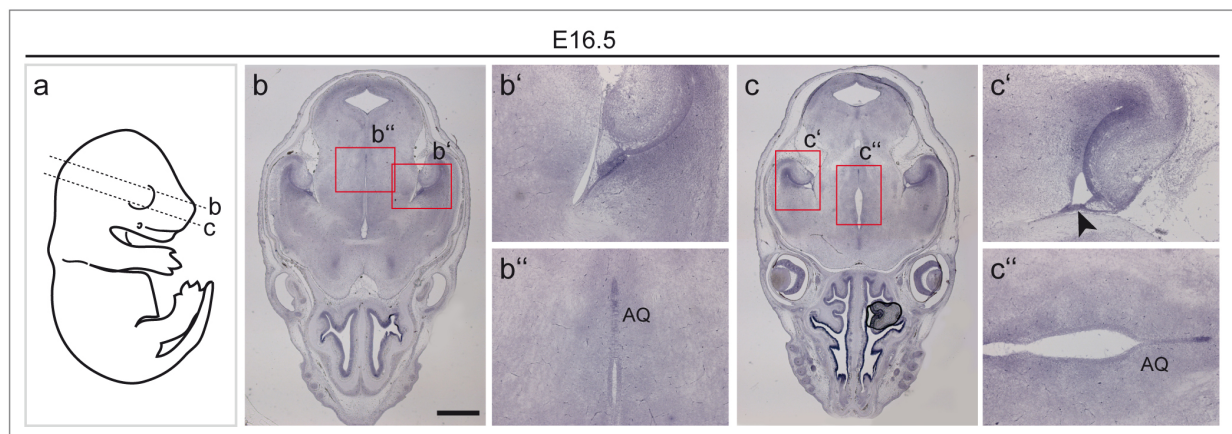

**Fig. S6. *Cfap206* expression in mouse E16.5 embryonic brain.**

(a) Schematic representation of section planes used for SISH in (b) and (c). Red rectangles in (b) and (c) indicate the areas shown enlarged in (b') and (b''), and (c') and (c''). *Cfap206* was expressed in the aqueduct (AQ) and in cells lining the medial wall of the lateral ventricles (arrow head).

Scale bar: 1 mm.

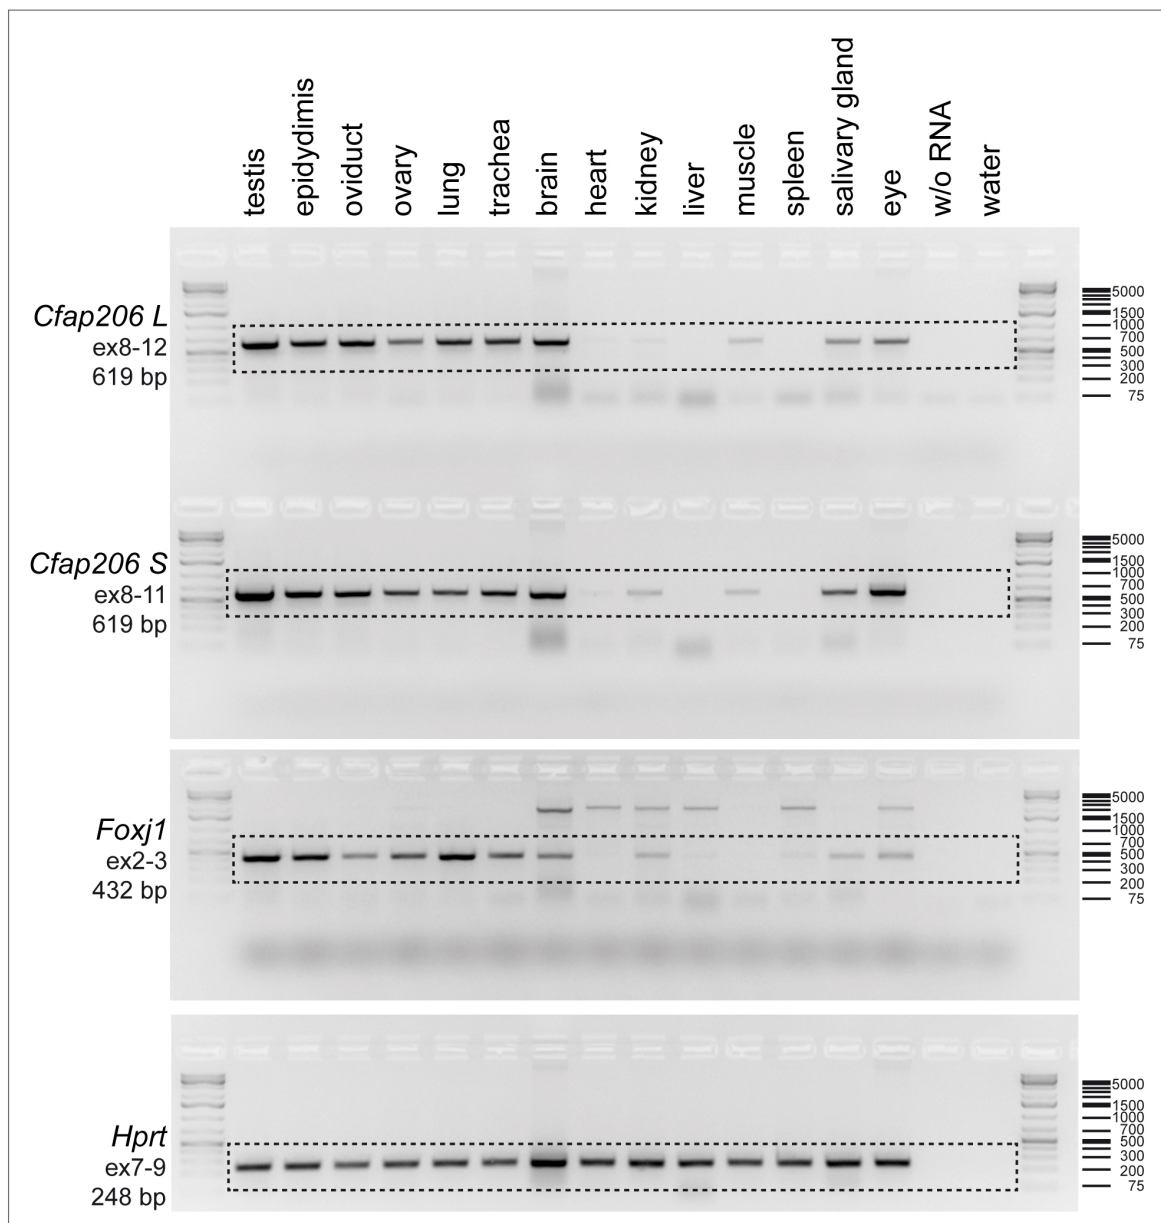

**Fig. S7. Full size agarose gel of the RT-PCR analysis of mouse adult tissues.** Black dashed boxes indicate the gel areas shown in Fig. 1B. GeneRuler 1kb Plus was used as standard.

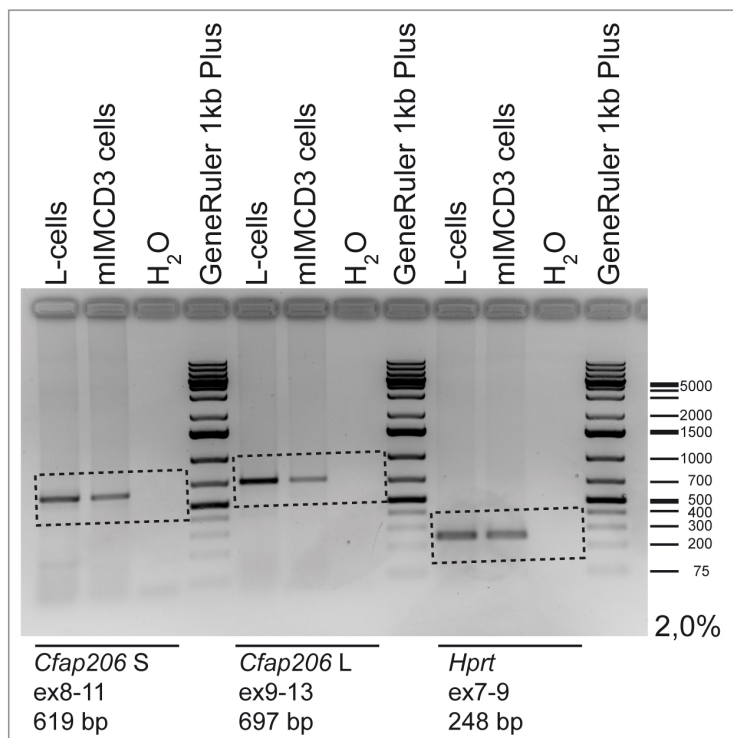

**Fig. S8. Full size agarose gel of the RT-PCR analysis of L- and mIMCD3 cells.**

Black dashed boxes indicate the gel areas shown in Fig. S1B. GeneRuler 1kb Plus was used as standard.



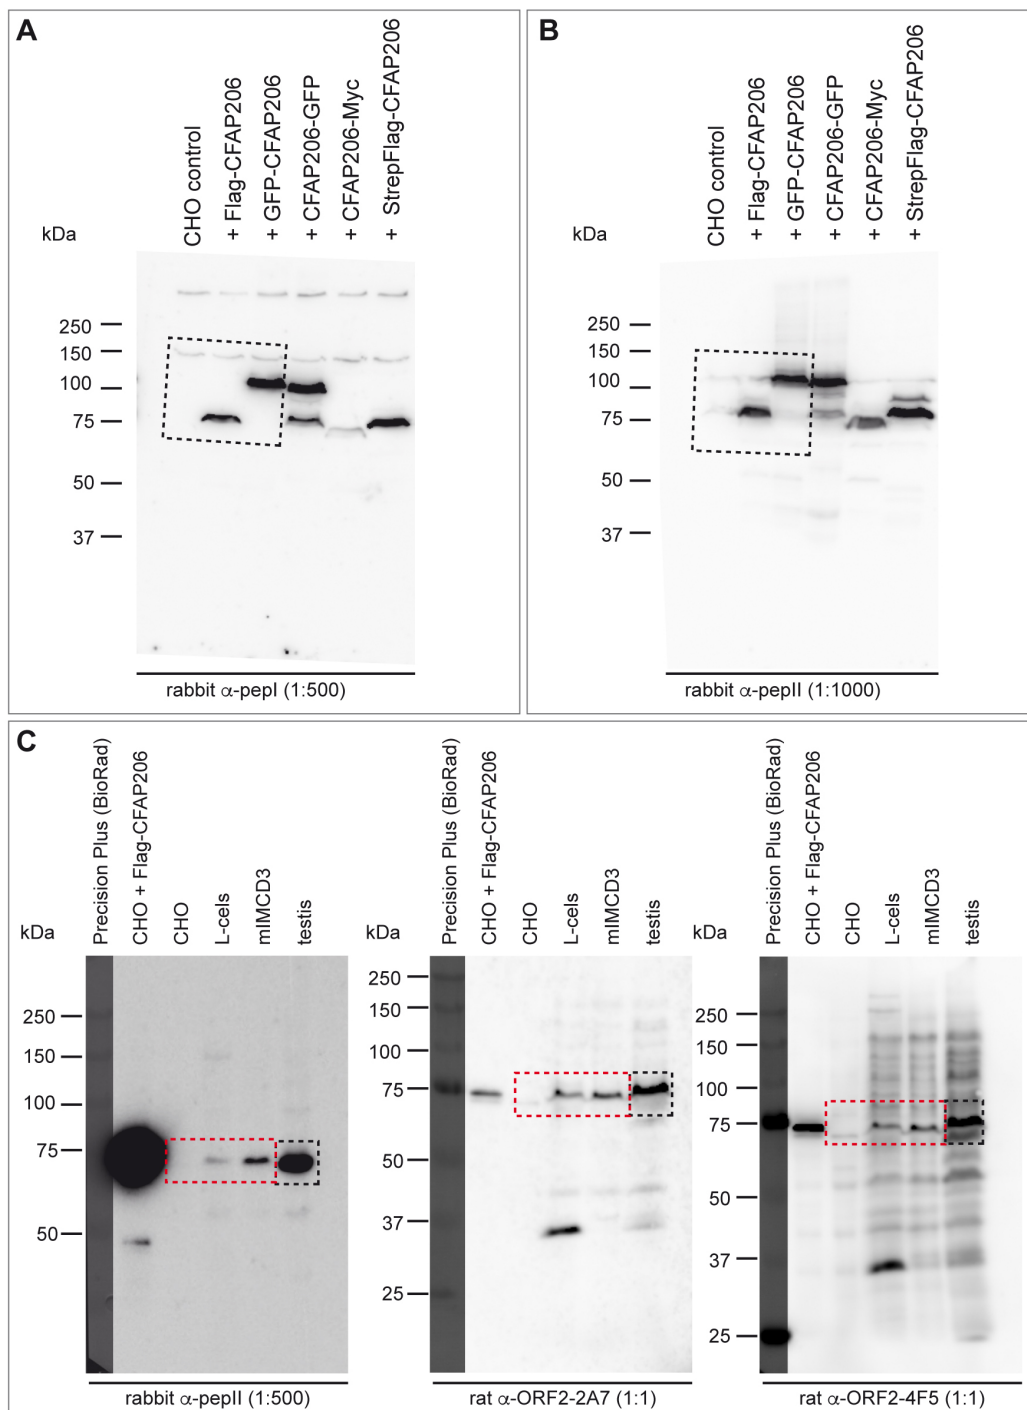

**Fig. S9. Full size Western blots of CHO, L- and mIMCD3 cell lysates as well as wild type mouse testis lysates.**

Black dashed boxes indicate membrane areas shown in Fig. 3A. Red dashed boxes indicate membrane areas shown in Fig. S1C. Precision Plus Dual Color (BioRad) was used as protein size standard.

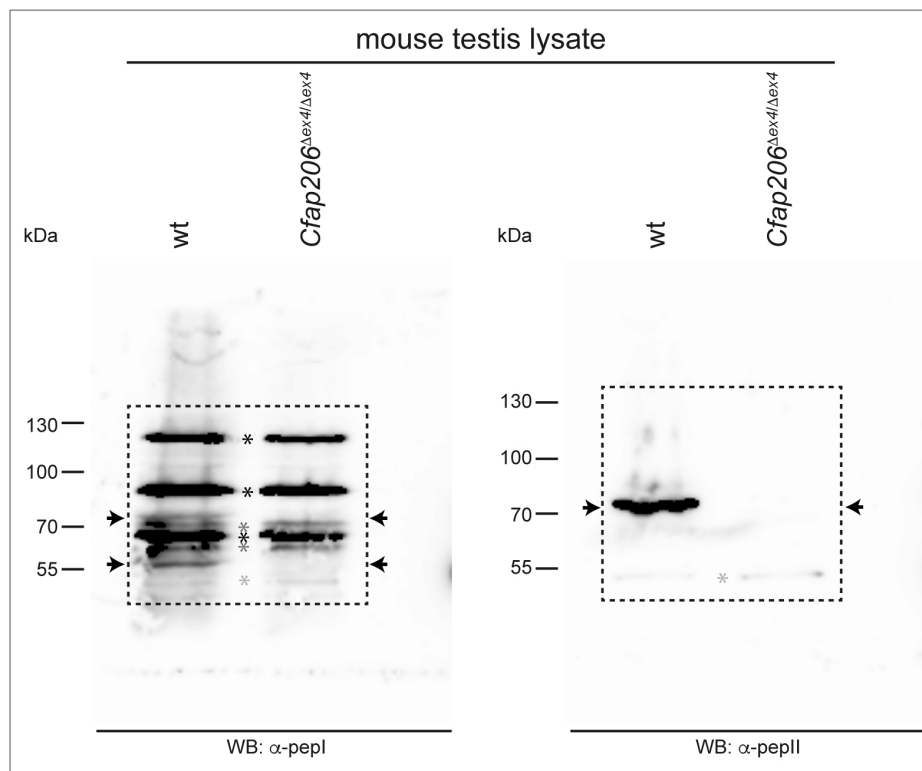

**Fig. S10. Full size Western blots of wild type and *Cfap206*<sup>Δex4/Δex4</sup> mutant mouse testis lysates.**

Black dashed boxes indicate membrane areas shown in Fig. 5B. Arrows mark the CFAP206 specific bands, disappearing in the mutant. Asterisks mark the unspecific bands seen in wild type and mutant lysates. PageRuler Prestained Protein Ladder (ThermoFisher) was used as protein size standard.

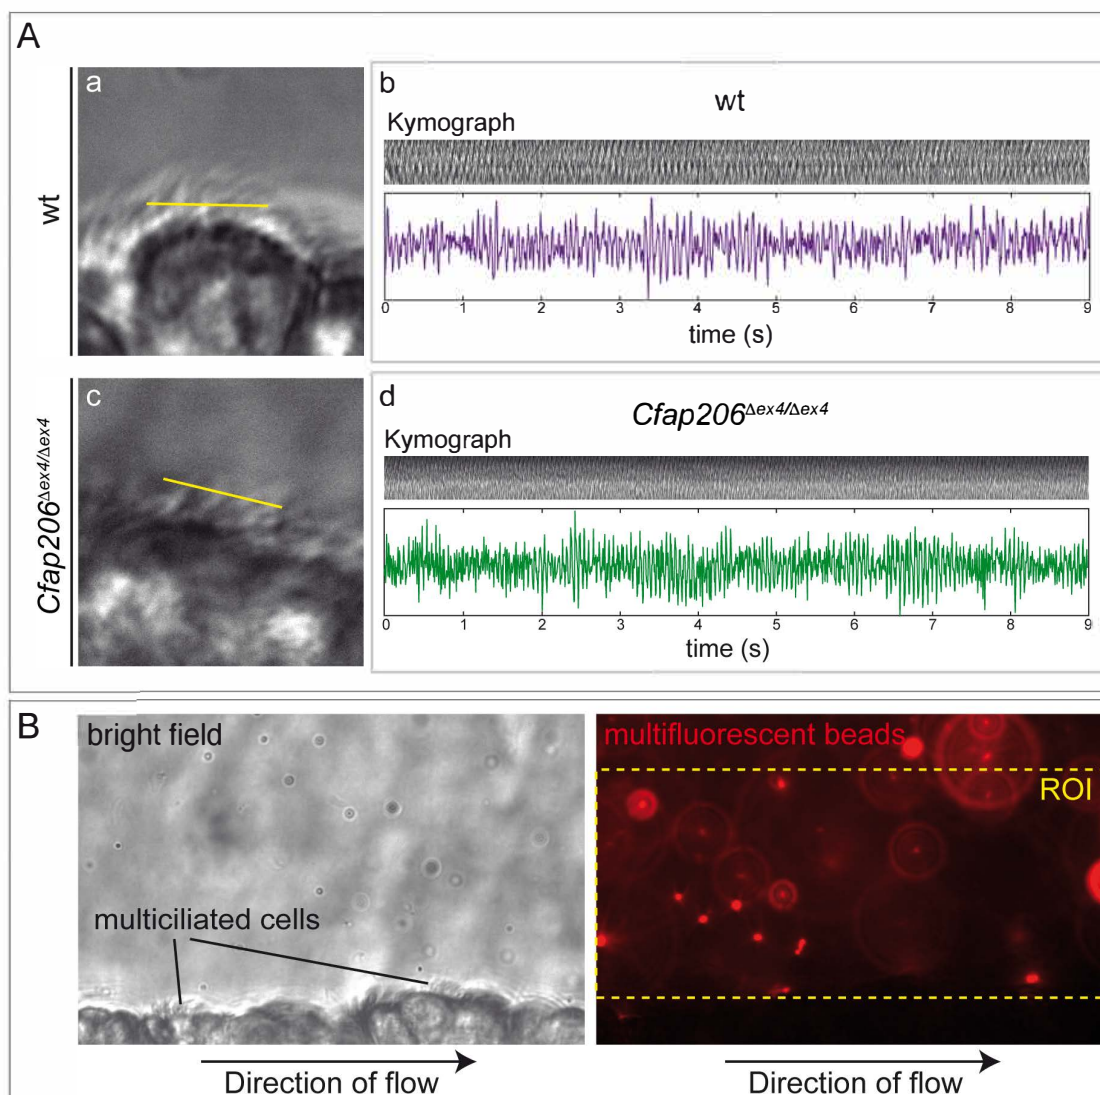

**Fig. S11. Ciliary beat frequency (CBF) and cilia generated flow in wild type and *Cfap206* mutant multiciliated tracheal cells.**

(A) Representative single frames (a,c) of movies (Movie S4) show the region of interest (ROI; yellow line), set parallel to the surface of the cell of interest using FIJI (Schindelin et al., 2012). Representative kymographs (b,d) for the ROI and plotted graphs whose values were used for analysis. (B) A representative bright field image (left) shows ciliated cells of the trachea explant. The single frame of the recorded movie displays multiple fluorescent beads that were tracked in defined ROIs (yellow dashed box) to determine the average bead velocity in  $\mu\text{m/s}$  using IMARIS (bitplane).

Table S1. Similarity matrix of CFAP206 amino acid sequences from different species.

|                       |                        | Identity Scores (%) |                    |                  |                  |                 |                       |                        |                       |                       |
|-----------------------|------------------------|---------------------|--------------------|------------------|------------------|-----------------|-----------------------|------------------------|-----------------------|-----------------------|
|                       |                        | <i>H. sapiens</i>   | <i>M. musculus</i> | <i>G. gallus</i> | <i>X. laevis</i> | <i>D. rerio</i> | <i>B. lanceolatum</i> | <i>C. intestinalis</i> | <i>T. thermophila</i> | <i>C. reinhardtii</i> |
| Similarity Scores (%) | <i>H. sapiens</i>      | 100.0               | 79.9               | 57.9             | 57.5             | 47.0            | 60.5                  | 59.2                   | 24.0                  | 19.3                  |
|                       | <i>M. musculus</i>     | 90.2                | 100.0              | 58.4             | 58.7             | 48.1            | 62.1                  | 62.4                   | 24.0                  | 19.9                  |
|                       | <i>G. gallus</i>       | 76.5                | 77.0               | 100.0            | 53.1             | 45.6            | 55.7                  | 55.7                   | 22.9                  | 19.2                  |
|                       | <i>X. laevis</i>       | 72.9                | 74.2               | 70.4             | 100.0            | 43.2            | 58.8                  | 57.7                   | 22.7                  | 18.7                  |
|                       | <i>D. rerio</i>        | 67.3                | 69.0               | 65.3             | 63.6             | 100.0           | 51.1                  | 49.5                   | 22.2                  | 19.9                  |
|                       | <i>B. lanceolatum</i>  | 76.5                | 77.5               | 73.7             | 73.8             | 70.4            | 100.0                 | 74.1                   | 25.0                  | 21.1                  |
|                       | <i>C. intestinalis</i> | 77.2                | 79.0               | 74.5             | 73.7             | 70.6            | 86.8                  | 100.0                  | 24.1                  | 19.7                  |
|                       | <i>T. thermophila</i>  | 43.2                | 43.5               | 43.4             | 40.9             | 42.4            | 44.1                  | 44.6                   | 100.0                 | 17.6                  |
|                       | <i>C. reinhardtii</i>  | 35.2                | 34.5               | 34.3             | 32.6             | 35.6            | 36.6                  | 35.9                   | 32.9                  | 100.0                 |

**Table S2. Raw data of cilia generated flow (CGF in  $\mu\text{m/s}$ ) on *Xenopus* epidermal MCCs.**

|                                                  | wt            | sgRNA 1       | sgRNA 2       |
|--------------------------------------------------|---------------|---------------|---------------|
| cilia generated flow (speed in $\mu\text{m/s}$ ) | 510.97        | 364.19        | 511.00        |
|                                                  | 519.58        | 488.97        | 411.28        |
|                                                  | 619.95        | 569.18        | 407.27        |
|                                                  | 567.34        | 268.31        | 326.99        |
|                                                  | 584.10        | 435.80        | 493.77        |
|                                                  | 431.44        | 473.26        | 481.41        |
|                                                  | 627.71        | 443.64        | 459.87        |
|                                                  | 547.50        | 267.90        | 140.77        |
|                                                  | 518.58        | 460.94        | 382.41        |
|                                                  | 221.29        | 472.62        | 358.17        |
|                                                  | 637.57        | 627.06        | 333.65        |
|                                                  | 640.22        | 377.69        | 283.87        |
|                                                  | 549.52        | 596.60        | 389.40        |
|                                                  | 531.09        | 539.60        | 446.79        |
|                                                  | 738.97        | 413.98        | 505.09        |
| <b>mean</b>                                      | <b>549.72</b> | <b>453.32</b> | <b>395.45</b> |
| <b>s.d.</b>                                      | <b>116.44</b> | <b>106.20</b> | <b>98.93</b>  |

Table S3. Raw data of ciliary beat frequency (CBF in Hz) on *Xenopus* epidermal MCCs.

|        |                             | wt   |      |       |      |      |      |      |      |      |      |      |      |      |      |      |
|--------|-----------------------------|------|------|-------|------|------|------|------|------|------|------|------|------|------|------|------|
| animal |                             | 1    | 2    | 3     | 4    | 5    | 6    | 7    | 8    | 9    | 10   | 11   | 12   | 13   | 14   | 15   |
|        | ciliary beat frequency (Hz) | 10.5 | 19   | 19.5  | 21   | 21   | 24.5 | 23.5 | 27.5 | 27   | 25   | 23   | 26.5 | 26   | 26.5 | 23.5 |
|        | s.d.                        | 0.61 | 0.89 | 2.55  | 1.46 | 0.65 | 2.36 | 1.22 | 2.38 | 3.96 | 2.71 | 1.47 | 1.78 | 2.20 | 1.04 | 2.07 |
|        | mean                        | 11   | 18.4 | 15.5  | 20.5 | 20.6 | 25.6 | 25   | 23.6 | 27.2 | 24.2 | 22.4 | 24.6 | 22.2 | 25.3 | 21.6 |
|        | s.d.                        | 11   | 17.5 | 12.5  | 22   | 20.5 | 22   | 26   | 23   | 32   | 26   | 22   | 22.5 | 21.5 | 26   | 20.5 |
|        | mean                        | 11   | 17.5 | 14.50 | 18.5 | 21   | 26.5 | 24.5 | 23   | 21   | 24.5 | 20   | 26   | 20.5 | 24.5 | 18.5 |

  

|        |                             | sgRNA 1 |      |      |      |      |      |      |      |      |      |      |      |      |      |      |
|--------|-----------------------------|---------|------|------|------|------|------|------|------|------|------|------|------|------|------|------|
| animal |                             | 1       | 2    | 3    | 4    | 5    | 6    | 7    | 8    | 9    | 10   | 11   | 12   | 13   | 14   | 15   |
|        | ciliary beat frequency (Hz) | 23      | 23.5 | 22.5 | 24   | 22.5 | 29.5 | 28.5 | 27   | 26.5 | 27.5 | 31.5 | 23.5 | 29   | 29   | 28.5 |
|        | s.d.                        | 1.15    | 3.60 | 1.72 | 1.27 | 2.88 | 4.11 | 5.28 | 3.01 | 2.25 | 4.13 | 3.06 | 3.52 | 4.26 | 1.56 | 1.82 |
|        | mean                        | 22.2    | 20.6 | 21.3 | 24   | 22.6 | 29.1 | 21.5 | 25.2 | 27.6 | 26.3 | 27   | 27.1 | 28   | 28.6 | 25.3 |
|        | s.d.                        | 20.5    | 15   | 19   | 24   | 18.5 | 22   | 18.5 | 21.5 | 26   | 22   | 25   | 26.5 | 32.5 | 26   | 24.5 |

  

|        |                             | sgRNA 2 |      |      |      |      |      |      |      |      |      |      |      |      |      |      |
|--------|-----------------------------|---------|------|------|------|------|------|------|------|------|------|------|------|------|------|------|
| animal |                             | 1       | 2    | 3    | 4    | 5    | 6    | 7    | 8    | 9    | 10   | 11   | 12   | 13   | 14   | 15   |
|        | ciliary beat frequency (Hz) | 23.5    | 20.5 | 26.5 | 23   | 23.5 | 31   | 32.5 | 26   | 26.5 | 27   | 28.5 | 28.5 | 27   | 25   | 26   |
|        | s.d.                        | 1.96    | 2.43 | 1.71 | 3.07 | 2.16 | 3.07 | 2.63 | 2.17 | 2.89 | 2.46 | 1.35 | 0.94 | 2.67 | 1.08 | 2.68 |
|        | mean                        | 22.2    | 23.4 | 25.9 | 26.3 | 25.4 | 28.6 | 28.4 | 26.2 | 23.3 | 27.2 | 28.7 | 28.5 | 24.5 | 26.6 | 25.1 |
|        | s.d.                        | 19      | 24   | 24   | 25.5 | 25.5 | 23.5 | 25.5 | 23   | 19   | 26   | 29.5 | 29   | 21.5 | 26.5 | 26   |

Table S4. Length of cilia determined in isolated mouse tracheal epithelial cells (mTECs).

| animal      |       | wt            |                  |               |                  |               |                  | <i>Cfap206<sup>Δex4/Δex4</sup></i> |                  |               |                  |               |                  |
|-------------|-------|---------------|------------------|---------------|------------------|---------------|------------------|------------------------------------|------------------|---------------|------------------|---------------|------------------|
| cell        | ROI # | 1             |                  | 2             |                  | 3             |                  | 1                                  |                  | 2             |                  | 3             |                  |
|             |       | length        | average/<br>cell | length        | average/<br>cell | length        | average/<br>cell | length                             | average/<br>cell | length        | average/<br>cell | length        | average/<br>cell |
| 1           | 1     | 4.138         |                  | 4.142         |                  | 3.883         |                  | 4.057                              |                  | 3.999         |                  | 3.639         |                  |
|             | 2     | 4.872         | 4.151            | 3.393         | 3.640            | 3.389         | 3.690            | 3.805                              | 3.773            | 3.810         | 3.883            | 3.886         | 3.905            |
|             | 3     | 3.444         |                  | 3.384         |                  | 3.797         |                  | 3.457                              |                  | 3.841         |                  | 4.189         |                  |
| 2           | 1     | 4.243         |                  | 3.506         |                  | 3.329         |                  | 3.572                              |                  | 3.597         |                  | 4.888         |                  |
|             | 2     | 3.506         | 3.803            | 3.755         | 3.564            | 3.194         | 3.505            | 3.500                              | 3.514            | 3.311         | 3.421            | 4.150         | 4.283            |
|             | 3     | 3.660         |                  | 3.432         |                  | 3.991         |                  | 3.469                              |                  | 3.355         |                  | 3.810         |                  |
| 3           | 1     | 4.103         |                  | 4.258         |                  | 3.957         |                  | 3.289                              |                  | 4.150         |                  | 3.809         |                  |
|             | 2     | 3.668         | 3.818            | 3.985         | 4.195            | 3.341         | 3.513            | 3.730                              | 3.586            | 4.250         | 4.037            | 3.706         | 3.680            |
|             | 3     | 3.684         |                  | 4.343         |                  | 3.241         |                  | 3.738                              |                  | 3.711         |                  | 3.525         |                  |
| 4           | 1     | 3.090         |                  | 4.126         |                  | 4.671         |                  | 5.025                              |                  | 3.255         |                  | 2.894         |                  |
|             | 2     | 4.005         | 3.668            | 3.522         | 3.645            | 3.202         | 3.672            | 4.069                              | 4.325            | 2.914         | 3.308            | 2.582         | 2.746            |
|             | 3     | 3.908         |                  | 3.286         |                  | 3.144         |                  | 3.880                              |                  | 3.755         |                  | 2.762         |                  |
| 5           | 1     | 4.236         |                  | 3.706         |                  | 4.571         |                  | 3.803                              |                  | 3.969         |                  | 3.055         |                  |
|             | 2     | 3.818         | 4.173            | 4.244         | 3.996            | 4.215         | 4.352            | 3.486                              | 3.886            | 3.711         | 3.880            | 3.109         | 3.077            |
|             | 3     | 4.466         |                  | 4.037         |                  | 4.270         |                  | 4.369                              |                  | 3.960         |                  | 3.067         |                  |
| 6           | 1     | 3.691         |                  | 3.658         |                  | 4.468         |                  | 3.997                              |                  | 3.793         |                  | 2.936         |                  |
|             | 2     | 3.704         | 3.942            | 4.387         | 4.054            | 3.758         | 4.276            | 3.901                              | 4.033            | 3.271         | 3.534            | 4.034         | 3.498            |
|             | 3     | 4.430         |                  | 4.118         |                  | 4.603         |                  | 4.200                              |                  | 3.539         |                  | 3.525         |                  |
| 7           | 1     | 3.136         |                  | 3.574         |                  | 3.626         |                  | 3.282                              |                  | 4.090         |                  | 3.771         |                  |
|             | 2     | 3.899         | 3.391            | 2.727         | 3.122            | 4.229         | 3.913            | 3.173                              | 3.273            | 4.204         | 4.250            | 3.206         | 3.363            |
|             | 3     | 3.139         |                  | 3.065         |                  | 3.883         |                  | 3.364                              |                  | 4.457         |                  | 3.113         |                  |
| 8           | 1     | 4.936         |                  | 3.577         |                  | 4.460         |                  | 3.580                              |                  | 4.090         |                  | 3.755         |                  |
|             | 2     | 4.372         | 4.513            | 3.088         | 3.265            | 3.701         | 4.201            | 3.750                              | 3.705            | 4.204         | 4.250            | 4.154         | 3.897            |
|             | 3     | 4.230         |                  | 3.129         |                  | 4.441         |                  | 3.786                              |                  | 4.457         |                  | 3.781         |                  |
| 9           | 1     | 3.835         |                  | 3.832         |                  | 4.182         |                  | 4.187                              |                  | 4.757         |                  | 3.810         |                  |
|             | 2     | 3.997         | 3.702            | 3.908         | 3.675            | 4.117         | 4.137            | 4.061                              | 4.108            | 4.939         | 4.604            | 4.797         | 4.231            |
|             | 3     | 3.274         |                  | 3.286         |                  | 4.111         |                  | 4.075                              |                  | 4.117         |                  | 4.087         |                  |
| 10          | 1     | 4.524         |                  | 4.282         |                  | 4.731         |                  | 3.822                              |                  | 3.417         |                  | 3.793         |                  |
|             | 2     | 3.792         | 3.882            | 4.514         | 4.507            | 3.380         | 3.938            | 3.786                              | 3.881            | 3.919         | 3.409            | 3.604         | 3.679            |
|             | 3     | 3.329         |                  | 4.724         |                  | 3.702         |                  | 4.036                              |                  | 2.890         |                  | 3.639         |                  |
| 11          | 1     | 3.786         |                  | 4.037         |                  | 2.952         |                  | 3.911                              |                  | 3.330         |                  | 3.192         |                  |
|             | 2     | 3.899         | 3.846            | 4.498         | 4.215            | 3.639         | 3.600            | 3.350                              | 3.415            | 4.643         | 3.896            | 3.389         | 3.181            |
|             | 3     | 3.852         |                  | 4.111         |                  | 4.208         |                  | 2.985                              |                  | 3.714         |                  | 2.961         |                  |
| 12          | 1     | 3.692         |                  | 3.849         |                  | 3.341         |                  | 4.183                              |                  | 2.820         |                  | 3.006         |                  |
|             | 2     | 3.551         | 3.743            | 3.521         | 3.609            | 3.711         | 3.562            | 4.187                              | 3.993            | 4.157         | 3.539            | 3.976         | 3.480            |
|             | 3     | 3.987         |                  | 3.457         |                  | 3.634         |                  | 3.608                              |                  | 3.639         |                  | 3.457         |                  |
| 13          | 1     | 2.858         |                  | 3.506         |                  | 3.035         |                  | 3.837                              |                  | 2.939         |                  | 3.771         |                  |
|             | 2     | 4.150         | 3.359            | 3.485         | 3.482            | 2.762         | 3.201            | 4.201                              | 3.842            | 3.153         | 3.154            | 3.430         | 3.635            |
|             | 3     | 3.069         |                  | 3.455         |                  | 3.806         |                  | 3.489                              |                  | 3.371         |                  | 3.705         |                  |
| 14          | 1     | 3.090         |                  | 2.746         |                  | 3.329         |                  | 3.155                              |                  | 3.561         |                  | 3.604         |                  |
|             | 2     | 3.931         | 3.531            | 3.295         | 3.543            | 3.531         | 3.552            | 3.341                              | 3.414            | 3.215         | 3.487            | 4.022         | 3.875            |
|             | 3     | 3.572         |                  | 4.588         |                  | 3.796         |                  | 3.745                              |                  | 3.684         |                  | 3.999         |                  |
| 15          | 1     | 3.845         |                  | 3.468         |                  | 3.878         |                  | 4.096                              |                  | 3.706         |                  | 4.393         |                  |
|             | 2     | 4.041         | 3.993            | 3.656         | 3.681            | 3.577         | 3.647            | 4.304                              | 4.127            | 3.639         | 3.666            | 4.348         | 4.122            |
|             | 3     | 4.094         |                  | 3.919         |                  | 3.485         |                  | 3.981                              |                  | 3.653         |                  | 3.626         |                  |
| 16          | 1     | 4.595         |                  | 3.199         |                  | 4.055         |                  | 2.626                              |                  | 3.071         |                  | 3.745         |                  |
|             | 2     | 3.395         | 4.008            | 3.081         | 3.243            | 3.635         | 3.949            | 3.271                              | 3.296            | 3.153         | 3.020            | 3.770         | 3.758            |
|             | 3     | 4.033         |                  | 3.449         |                  | 4.157         |                  | 3.991                              |                  | 2.835         |                  | 3.758         |                  |
| 17          | 1     | 3.917         |                  | 4.020         |                  | 4.307         |                  | 3.359                              |                  | 3.580         |                  | 5.574         |                  |
|             | 2     | 3.796         | 3.783            | 3.177         | 3.400            | 3.745         | 3.867            | 4.304                              | 3.620            | 3.088         | 3.308            | 5.236         | 5.018            |
|             | 3     | 3.635         |                  | 3.003         |                  | 3.550         |                  | 3.196                              |                  | 3.255         |                  | 4.244         |                  |
| 18          | 1     | 3.446         |                  | 3.244         |                  | 4.515         |                  | 4.012                              |                  | 3.906         |                  | 4.730         |                  |
|             | 2     | 4.100         | 3.739            | 3.129         | 3.147            | 3.906         | 3.886            | 4.011                              | 3.909            | 3.899         | 4.029            | 4.562         | 4.513            |
|             | 3     | 3.671         |                  | 3.068         |                  | 3.236         |                  | 3.704                              |                  | 4.282         |                  | 4.247         |                  |
| 19          | 1     | 3.902         |                  | 4.200         |                  | 3.916         |                  | 2.896                              |                  | 2.990         |                  | 3.969         |                  |
|             | 2     | 3.878         | 3.804            | 4.342         | 4.235            | 3.521         | 3.651            | 3.361                              | 3.155            | 3.575         | 3.245            | 3.891         | 3.925            |
|             | 3     | 3.632         |                  | 4.162         |                  | 3.516         |                  | 3.209                              |                  | 3.171         |                  | 3.916         |                  |
| 20          | 1     | 3.320         |                  | 3.595         |                  | 4.037         |                  | 4.259                              |                  | 4.258         |                  | 4.660         |                  |
|             | 2     | 4.273         | 3.927            | 3.286         | 3.546            | 3.457         | 3.651            | 3.792                              | 3.906            | 5.097         | 4.571            | 3.449         | 3.855            |
|             | 3     | 4.188         |                  | 3.758         |                  | 3.460         |                  | 3.668                              |                  | 4.357         |                  | 3.455         |                  |
| mean ± s.d. |       | 3.839 ± 0.265 |                  | 3.688 ± 0.392 |                  | 3.788 ± 0.295 |                  | 3.738 ± 0.320                      |                  | 3.725 ± 0.461 |                  | 3.786 ± 0.514 |                  |

**Table S5. Raw data of cilia generated flow (CGF) in mouse lateral ventricles of P7 wild type and *Cfap206* <sup>$\Delta$ ex4/ $\Delta$ ex4</sup> individuals.**

|                                           | wt       | <i>Cfap206</i> <sup><math>\Delta</math>ex4/<math>\Delta</math>ex4</sup> |
|-------------------------------------------|----------|-------------------------------------------------------------------------|
| cilia generated flow (speed in $\mu$ m/s) | 22.84113 | 41.91978                                                                |
|                                           | 34.19332 | 37.88292                                                                |
|                                           | 49.32148 | 38.26470                                                                |
|                                           | 88.13414 | 35.77974                                                                |
|                                           | 48.16223 | 52.51180                                                                |
|                                           | 55.40595 | 46.23798                                                                |
|                                           | 67.78381 | 56.25151                                                                |
|                                           | 36.17910 | 66.49065                                                                |
|                                           |          | 76.26575                                                                |
|                                           |          | 57.4969                                                                 |
|                                           | 58.78702 |                                                                         |
|                                           | 69.65802 |                                                                         |
| mean                                      | 50.25    | 53.13                                                                   |
| s.d.                                      | 20.64    | 13.40                                                                   |



**Table S6. Raw data of ciliary beat frequencies (CBF in Hz) of tracheal cilia determined for four wild type and three *Cfap206* <sup>$\Delta$ ex4/ $\Delta$ ex4</sup> individuals.**

| animal                      | wt       |          |          |          | <i>Cfap206</i> <sup><math>\Delta</math>ex4/<math>\Delta</math>ex4</sup> |          |          |
|-----------------------------|----------|----------|----------|----------|-------------------------------------------------------------------------|----------|----------|
|                             | 1        | 2        | 3        | 4        | 1                                                                       | 2        | 3        |
| ciliary beat frequency (Hz) | 17.10042 | 13.53376 | 10.54963 | 12.11111 | 11.51071                                                                | 22.14208 | 20.17208 |
|                             | 15.22329 | 17.11192 | 11.20486 | 21.86727 | 11.66274                                                                | 13.65449 | 10.32187 |
|                             | 19.10983 | 12.74828 | 13.99043 | 13.57240 | 14.60921                                                                | 17.32688 | 12.75823 |
|                             | 11.44053 | 12.71578 | 11.65500 | 12.56809 | 14.91413                                                                | 17.86742 | 13.08916 |
|                             | 7.77512  | 12.27657 | 9.87756  | 11.33721 | 20.71800                                                                | 18.89366 | 22.74314 |
|                             | 16.33107 | 13.19257 | 9.43851  | 4.17744  | 14.09273                                                                | 14.31953 | 21.32114 |
|                             | 8.66607  | 14.61920 |          | 17.03413 | 18.18981                                                                | 15.56058 | 12.42436 |
|                             | 7.66300  | 17.53703 |          | 13.85719 | 23.52483                                                                | 30.79967 | 10.54057 |
|                             | 14.98737 | 10.51841 |          | 10.01698 | 16.56446                                                                | 11.44320 | 23.54256 |
|                             | 13.94269 | 15.65004 |          | 13.57124 | 13.31436                                                                | 14.87500 | 19.75199 |
|                             |          | 13.10887 |          | 12.40749 | 17.55519                                                                | 19.95191 | 21.87758 |
|                             |          | 11.55611 |          | 13.32692 |                                                                         |          | 24.39150 |
|                             |          | 10.76463 |          | 8.55988  |                                                                         |          | 20.84165 |
|                             |          | 18.53723 |          | 18.73473 |                                                                         |          |          |
|                             |          | 9.87364  |          | 13.43923 |                                                                         |          |          |
|                             |          | 16.39303 |          | 7.59564  |                                                                         |          |          |
|                             |          |          |          | 7.98897  |                                                                         |          |          |
|                             |          |          |          | 17.30027 |                                                                         |          |          |
|                             |          |          |          | 15.97561 |                                                                         |          |          |
|                             |          |          |          | 9.31289  |                                                                         |          |          |
|                             |          |          | 8.44739  |          |                                                                         |          |          |
|                             |          |          | 5.10061  |          |                                                                         |          |          |
|                             |          |          | 5.76986  |          |                                                                         |          |          |
|                             |          |          | 10.90554 |          |                                                                         |          |          |
|                             |          |          | 21.56941 |          |                                                                         |          |          |
| mean                        | 13.22    | 13.76    | 11.12    | 12.26    | 16.06                                                                   | 17.89    | 17.98    |
| s.d.                        | 4.10     | 2.64     | 1.63     | 4.72     | 3.73                                                                    | 5.26     | 5.27     |

**Table S7. Raw data of cilia generated flow (CGF) in mouse tracheal explants determined for four wild type and three *Cfap206* <sup>$\Delta$ ex4/ $\Delta$ ex4</sup> individuals.**

|                                              | wt      |          |         |         | <i>Cfap206</i> <sup><math>\Delta</math>ex4/<math>\Delta</math>ex4</sup> |         |          |
|----------------------------------------------|---------|----------|---------|---------|-------------------------------------------------------------------------|---------|----------|
| animal                                       | 1       | 2        | 3       | 4       | 1                                                                       | 2       | 3        |
| cilia generated<br>flow (speed in $\mu$ m/s) | 9.54661 | 7.06188  | 4.54716 | 4.97708 | 8.60762                                                                 | 3.96560 | 5.69169  |
|                                              | 5.87100 | 8.69106  | 8.05653 | 6.32160 | 5.40686                                                                 | 3.50495 | 4.24066  |
|                                              | 9.22160 | 10.68202 | 9.16563 | 9.97790 | 12.00591                                                                | 4.29557 | 4.13021  |
|                                              |         | 4.75734  | 9.65208 | 5.54395 | 10.98393                                                                | 5.89312 | 4.29781  |
|                                              |         | 7.80637  | 4.81116 | 6.30942 | 11.99785                                                                | 7.78172 | 11.11388 |
|                                              |         |          | 3.05738 | 6.53277 | 12.00956                                                                | 4.89477 | 9.69348  |
|                                              |         |          |         | 5.76499 | 10.62464                                                                |         | 10.21132 |
| mean                                         | 8.21    | 7.80     | 6.55    | 6.49    | 10.45                                                                   | 5.06    | 7.05     |
| s.d.                                         | 2.04    | 2.17     | 2.76    | 1.63    | 2.35                                                                    | 1.57    | 3.15     |

Table S8. Computer-assisted sperm analysis (CASA) of wild type and *Cfap206* <sup>$\Delta$ ex4/ $\Delta$ ex4</sup> sperm.

| animal ID | genotype                                                                | age (months) | sample measurement | sperm conc. (mio/ml) | progressiveness (%) | motile sperm (%) | immotile sperm (%) | velocity ( $\mu$ m/s) |
|-----------|-------------------------------------------------------------------------|--------------|--------------------|----------------------|---------------------|------------------|--------------------|-----------------------|
| 1         | wt                                                                      | 2            | epididymis_M1      | 58.2                 | 77.6                | 83               | 17                 | 17                    |
|           |                                                                         |              | epididymis_M2      | 53.6                 | 77.4                | 82.1             | 17.9               | 18                    |
|           |                                                                         |              | epididymis_M3      | 39.8                 | 76                  | 77.9             | 22.1               | 15                    |
|           |                                                                         |              | epididymis_M4      | 32.4                 | 66.8                | 69               | 31                 | 15                    |
|           |                                                                         |              | <b>mean</b>        | <b>46</b>            | <b>74.45</b>        | <b>78</b>        | <b>22</b>          | <b>16.25</b>          |
| 2         | wt                                                                      | 2            | epididymis_M1      | 47.3                 | 68.9                | 73.9             | 26.1               | 18.5                  |
|           |                                                                         |              | epididymis_M2      | 38.6                 | 56.8                | 63               | 37                 | 17                    |
|           |                                                                         |              | epididymis_M3      | 53.4                 | 81.1                | 84.9             | 15.1               | 19                    |
|           |                                                                         |              | epididymis_M4      | 55                   | 80.8                | 84               | 16                 | 19                    |
|           |                                                                         |              | epididymis_M5      | 83                   | 87.6                | 90               | 10                 | 16                    |
|           |                                                                         |              | epididymis_M6      | 73.7                 | 84.8                | 86.9             | 13.1               | 16                    |
|           |                                                                         |              | epididymis_M7      | 102.6                | 93.3                | 94.1             | 5.9                | 15                    |
|           |                                                                         |              | epididymis_M8      | 109.2                | 92.6                | 93.1             | 6.9                | 15                    |
|           |                                                                         |              | <b>mean</b>        | <b>70.4</b>          | <b>80.7</b>         | <b>83.7</b>      | <b>16.3</b>        | <b>16.9</b>           |
| 3         | wt                                                                      | 3            | epididymis_M1      | 48.6                 | 95.1                | 96               | 4                  | 18                    |
|           |                                                                         |              | epididymis_M2      | 29.6                 | 90                  | 91               | 9                  | 18                    |
|           |                                                                         |              | epididymis_M3      | 67.8                 | 98                  | 98.1             | 1.9                | 23                    |
|           |                                                                         |              | epididymis_M4      | 58.8                 | 96.1                | 97               | 3                  | 22                    |
|           |                                                                         |              | epididymis_M5      | 57.2                 | 88.8                | 90               | 10                 | 18                    |
|           |                                                                         |              | epididymis_M6      | 46.8                 | 86.1                | 87               | 13                 | 17                    |
|           |                                                                         |              | epididymis_M7      | 52.2                 | 86.2                | 86.9             | 13.1               | 16                    |
|           |                                                                         |              | epididymis_M8      | 48.6                 | 72.8                | 78               | 22                 | 18                    |
|           |                                                                         |              | <b>mean</b>        | <b>51.2</b>          | <b>89.1</b>         | <b>90.5</b>      | <b>9.5</b>         | <b>18.8</b>           |
| 4         | wt                                                                      | 3            | epididymis_M1      | 40.2                 | 69.1                | 71               | 29                 | 13                    |
|           |                                                                         |              | epididymis_M2      | 47.8                 | 68.4                | 72               | 28                 | 15                    |
|           |                                                                         |              | epididymis_M3      | 54.8                 | 67.4                | 71               | 29                 | 14                    |
|           |                                                                         |              | epididymis_M4      | 41                   | 67.4                | 71               | 29                 | 14                    |
|           |                                                                         |              | epididymis_M5      | 47.6                 | 44.5                | 49               | 51                 | 15                    |
|           |                                                                         |              | epididymis_M6      | 47.4                 | 52.8                | 57.1             | 42.9               | 14                    |
|           |                                                                         |              | epididymis_M7      | 52.6                 | 61.3                | 67               | 33                 | 14                    |
|           |                                                                         |              | epididymis_M8      | 34.2                 | 67.3                | 73.9             | 26.1               | 15                    |
|           |                                                                         |              | <b>mean</b>        | <b>45.7</b>          | <b>62.3</b>         | <b>66.5</b>      | <b>33.5</b>        | <b>14.3</b>           |
| 5         | <i>Cfap206</i> <sup><math>\Delta</math>ex4/<math>\Delta</math>ex4</sup> | 2            | epididymis_M1      | 41.2                 | 11.5                | 16               | 84                 | 11                    |
|           |                                                                         |              | epididymis_M2      | 36.4                 | 12                  | 17.1             | 82.9               | 10                    |
|           |                                                                         |              | epididymis_M3      | 42.6                 | 7.7                 | 10               | 90                 | 10                    |
|           |                                                                         |              | epididymis_M4      | 43.4                 | 9                   | 11               | 89                 | 10                    |
|           |                                                                         |              | <b>mean</b>        | <b>40.9</b>          | <b>10.05</b>        | <b>13.5</b>      | <b>86.5</b>        | <b>10.25</b>          |
| 6         | <i>Cfap206</i> <sup><math>\Delta</math>ex4/<math>\Delta</math>ex4</sup> | 2            | epididymis_M1      | 34.9                 | 21.2                | 23.5             | 76.5               | 12                    |
|           |                                                                         |              | epididymis_M2      | 36.4                 | 14.6                | 20               | 80                 | 11                    |
|           |                                                                         |              | epididymis_M3      | 36.1                 | 19.1                | 22               | 78                 | 10.5                  |
|           |                                                                         |              | epididymis_M4      | 40.6                 | 14.3                | 19               | 81                 | 12                    |
|           |                                                                         |              | epididymis_M5      | 42.2                 | 28.8                | 31               | 69                 | 12.5                  |
|           |                                                                         |              | epididymis_M6      | 39.4                 | 24.2                | 30               | 70                 | 13                    |
|           |                                                                         |              | epididymis_M7      | 49.2                 | 23.9                | 30.9             | 69.1               | 12                    |
|           |                                                                         |              | epididymis_M8      | 56.4                 | 31                  | 37.1             | 62.9               | 12                    |
|           |                                                                         |              | <b>mean</b>        | <b>41.9</b>          | <b>22.1</b>         | <b>26.7</b>      | <b>73.3</b>        | <b>11.9</b>           |
| 7         | <i>Cfap206</i> <sup><math>\Delta</math>ex4/<math>\Delta</math>ex4</sup> | 3            | epididymis_M1      | 55.4                 | 48.3                | 51               | 49                 | 12                    |
|           |                                                                         |              | epididymis_M2      | 49.8                 | 50.7                | 56               | 44                 | 14                    |
|           |                                                                         |              | epididymis_M3      | 59.6                 | 52                  | 56.9             | 43.1               | 11.5                  |
|           |                                                                         |              | epididymis_M4      | 49.4                 | 41.3                | 49               | 51                 | 13                    |
|           |                                                                         |              | epididymis_M5      | 54.6                 | 57.5                | 60               | 40                 | 11                    |
|           |                                                                         |              | epididymis_M6      | 43.8                 | 42.7                | 46               | 54                 | 13                    |
|           |                                                                         |              | epididymis_M7      | 42                   | 39.5                | 46               | 54                 | 15                    |
|           |                                                                         |              | epididymis_M8      | 43.8                 | 46.9                | 53.9             | 46.1               | 14                    |
|           |                                                                         |              | epididymis_M9      | 51.8                 | 35.4                | 40.9             | 59.1               | 13                    |
|           |                                                                         |              | epididymis_M10     | 45                   | 31.5                | 38               | 62                 | 15                    |
|           |                                                                         |              | epididymis_M11     | 47.4                 | 39.7                | 46               | 54                 | 14                    |
|           |                                                                         |              | epididymis_M12     | 49.8                 | 30.3                | 36               | 64                 | 14                    |
|           |                                                                         |              | <b>mean</b>        | <b>49.4</b>          | <b>43.0</b>         | <b>48.3</b>      | <b>51.7</b>        | <b>13.3</b>           |
| 8         | <i>Cfap206</i> <sup><math>\Delta</math>ex4/<math>\Delta</math>ex4</sup> | 3            | epididymis_M1      | 79.6                 | 25.8                | 32.0             | 68.0               | 12                    |
|           |                                                                         |              | epididymis_M2      | 79.2                 | 23.8                | 31.0             | 69.0               | 11                    |
|           |                                                                         |              | epididymis_M3      | 80                   | 34.2                | 37.0             | 63.0               | 12                    |
|           |                                                                         |              | epididymis_M4      | 60                   | 13                  | 19.0             | 81.0               | 12                    |
|           |                                                                         |              | epididymis_M5      | 63.2                 | 20.3                | 27.0             | 73.0               | 11                    |
|           |                                                                         |              | epididymis_M6      | 58.4                 | 22.4                | 29.0             | 71.0               | 12                    |
|           |                                                                         |              | epididymis_M7      | 46.4                 | 10.4                | 18.0             | 82.0               | 12                    |
|           |                                                                         |              | epididymis_M8      | 52.4                 | 15.7                | 23.0             | 77.0               | 13                    |
|           |                                                                         |              | epididymis_M9      | 50                   | 13.2                | 16.0             | 84.0               | 10                    |
|           |                                                                         |              | epididymis_M10     | 83.6                 | 30.2                | 33.0             | 67.0               | 11                    |
|           |                                                                         |              | epididymis_M11     | 71.2                 | 24.1                | 28.0             | 72.0               | 12                    |
|           |                                                                         |              | epididymis_M12     | 64                   | 20                  | 28.0             | 72.0               | 12                    |
|           |                                                                         |              | <b>mean</b>        | <b>65.7</b>          | <b>21.1</b>         | <b>26.75</b>     | <b>73.25</b>       | <b>11.7</b>           |

**Table S9. Blastocyst development in IVF of wild type and *Cfap206* <sup>$\Delta ex4/\Delta ex4$</sup>  sperm.**

| genotype                                                     | eggs | eggs/experiment<br>(mean $\pm$ s.d.) | blastocysts<br>after IVF | blastocysts/<br>experiment | developed blastocysts<br>(% $\pm$ s.d.) |
|--------------------------------------------------------------|------|--------------------------------------|--------------------------|----------------------------|-----------------------------------------|
| wt                                                           | 1132 | 377 $\pm$ 53                         | 656                      | 219 $\pm$ 39               | 57,76 $\pm$ 2,78                        |
| <i>Cfap206</i> <sup><math>\Delta ex4/\Delta ex4</math></sup> | 1657 | 552 $\pm$ 87                         | 11                       | 3,7 $\pm$ 4,0              | 0,70 $\pm$ 0,69                         |

Table S10. Phenotypes of wild type and *Cfap206*<sup>Δex4/Δex4</sup> sperm.

| phenotype           | wt     |        |       |        |        |       |       | <i>Cfap206</i> <sup>Δex4/Δex4</sup> |        |       |        |        |       |       |
|---------------------|--------|--------|-------|--------|--------|-------|-------|-------------------------------------|--------|-------|--------|--------|-------|-------|
|                     | normal |        | bent  |        | coiled |       | total | normal                              |        | bent  |        | coiled |       | total |
|                     | count  | %      | count | %      | count  | %     |       | count                               | %      | count | %      | count  | %     |       |
| sperm preparation 1 | 68     | 81.928 | 11    | 13.253 | 4      | 4.819 | 83    | 43                                  | 56.579 | 28    | 36.842 | 5      | 6.579 | 76    |
| sperm preparation 2 | 309    | 89.049 | 34    | 9.798  | 4      | 1.153 | 347   | 110                                 | 41.667 | 140   | 53.03  | 14     | 5.303 | 264   |
| sperm preparation 3 | 287    | 87.5   | 41    | 12.5   | 0      | 0     | 328   | 236                                 | 75.884 | 69    | 22.186 | 6      | 1.929 | 311   |
| sperm preparation 4 | 438    | 84.884 | 75    | 14.535 | 3      | 0.581 | 516   | 237                                 | 45.665 | 259   | 49.904 | 23     | 4.432 | 519   |
|                     | 1102   |        | 161   |        | 11     |       | 1274  | 626                                 |        | 496   |        | 48     |       | 1170  |
| mean %              |        | 85.84  |       | 12.522 |        | 1.638 |       |                                     | 54.949 |       | 40.491 |        | 4.561 |       |
| s.d.                |        | 3.124  |       | 2      |        | 2.172 |       |                                     | 15.314 |       | 14.074 |        | 1.963 |       |

Table S11. Potential interaction partners of CFAP206 identified by mass spectrometry. CFAP206 (C6orf165 homolog) is marked in yellow

[Click here to Download Table S11](#)

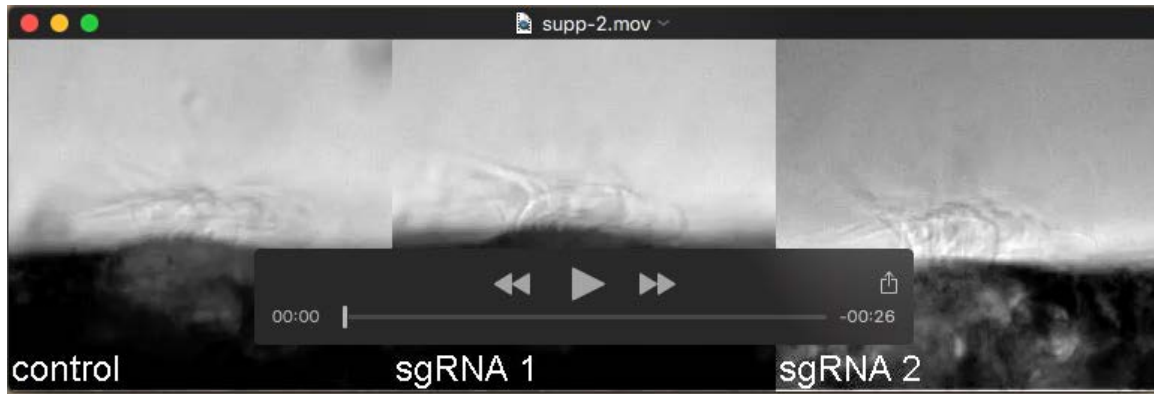

**Movie 1. Cilia motility in wild type and *cfap206* crispant *Xenopus* larval skin.**

High-speed (800 frames per second (fps)) videography of single MCCs at stage 32. Left: wild type (control); middle: sgRNA1 crispant; right: sgRNA2 crispant. Note that cilia were motile in all cases. Movie plays at 15 fps, i.e. at about 0.02x real time.

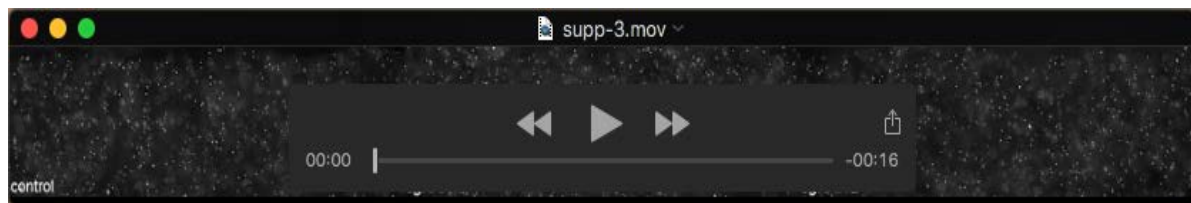

**Movie 2. Bead transport in wild type and *cfap206* crispant *Xenopus* larval skin.**

Fluorescent beads were added to wild type or crispant specimens at stage 32 and bead transport was recorded at 175 fps. Left: wild type; middle: sgRNA1 crispant; right: sgRNA2 crispant. Measured bead transport was slower in crispants. Movie plays at 50 fps, i.e. at about 0.3x real time.

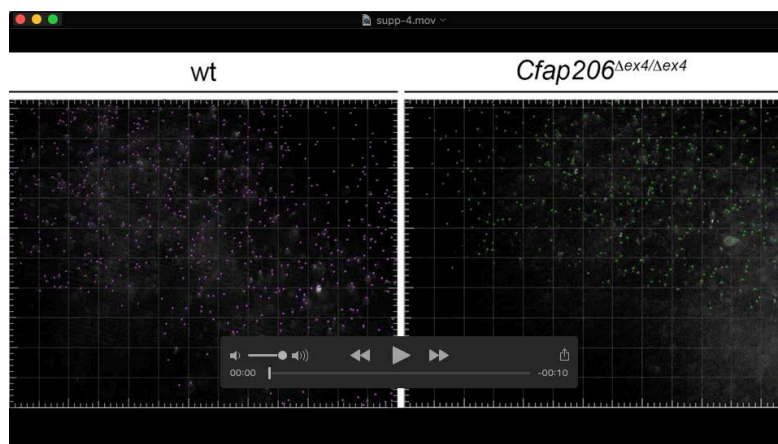

**Movie 3. Tracking of fluorescent beads to determine cilia generated flow in mouse endyma.**

Representative movies showing tracked fluorescent beads in lateral ventricle explants wild type (left) and *Cfap206*<sup>Δex4/Δex4</sup> (right) P7 old mice. The speed of the fluorescent beads was determined by tracking using IMARIS (bitplane). Bullets represent the tracked beads (violet, wild type; green, *Cfap206*<sup>Δex4/Δex4</sup>). Movies were recorded at a rate of 6.7 fps and played back at a rate of 10 fps.

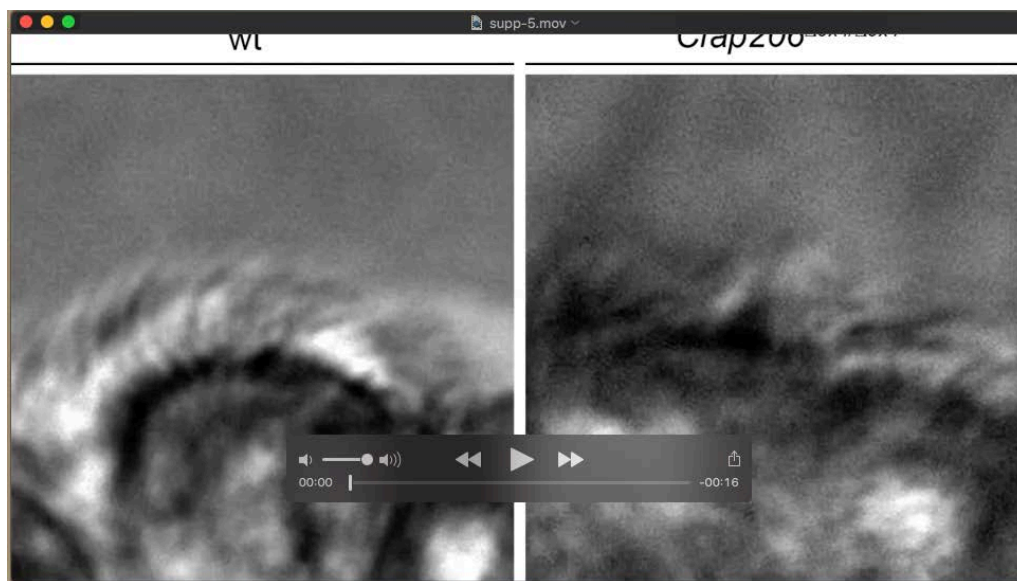

**Movie 4. Ciliary motility of wild type and *Cfap206*<sup>Δex4/Δex4</sup> murine tracheal epithelial cells.** Representative movies showing tracheal multiciliated cells of wild type (left) and *Cfap206*<sup>Δex4/Δex4</sup> (right) mice. The movies were recorded at a rate of 159.27 and 164.58 fps, respectively for 9 s and played back at a rate of 15 fps.

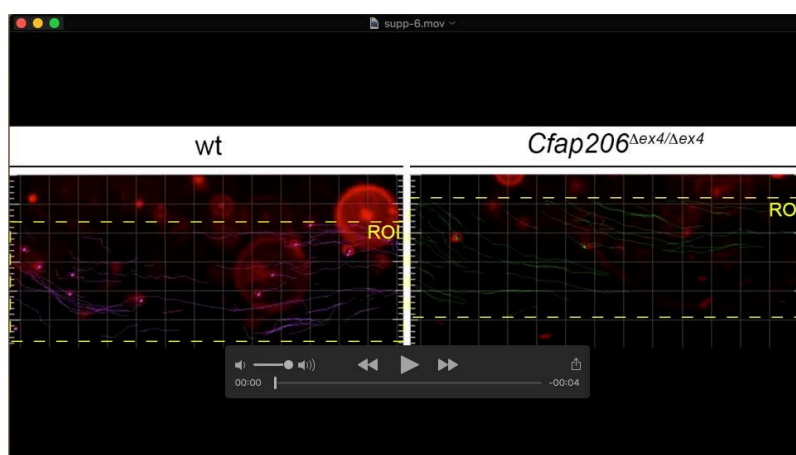

**Movie 5. Tracking of fluorescent beads to determine cilia generated flow in mouse tracheas.** Representative movies showing tracked fluorescent beads in trachea explants of wild type (left) and *Cfap206*<sup>Δex4/Δex4</sup> (right) mice. The speed of the fluorescent beads was determined by tracking using IMARIS (bitplane). Bullets represent the tracked beads, lines trace the bead tracks (violet, wild type; green, *Cfap206*<sup>Δex4/Δex4</sup>). Movies were recorded with 4.76 fps and played back at a rate of 10 fps.

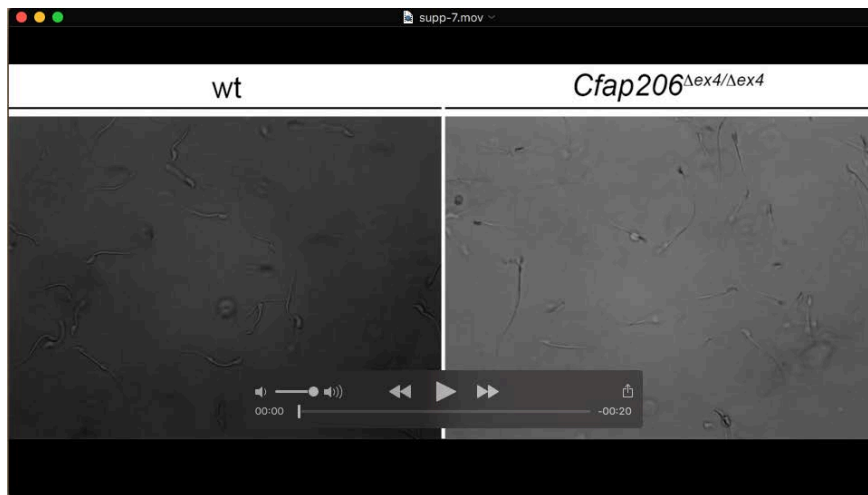

**Movie 6. Motility of wild type and *Cfap206*<sup>Δex4/Δex4</sup> mouse sperm cells.**

Representative movies showing normal motility of wild type (left) and abnormal inefficient motility of *Cfap206*<sup>Δex4/Δex4</sup> (right) sperm. Movies were recorded at a rate of 5.18 fps and played back with 12 fps.

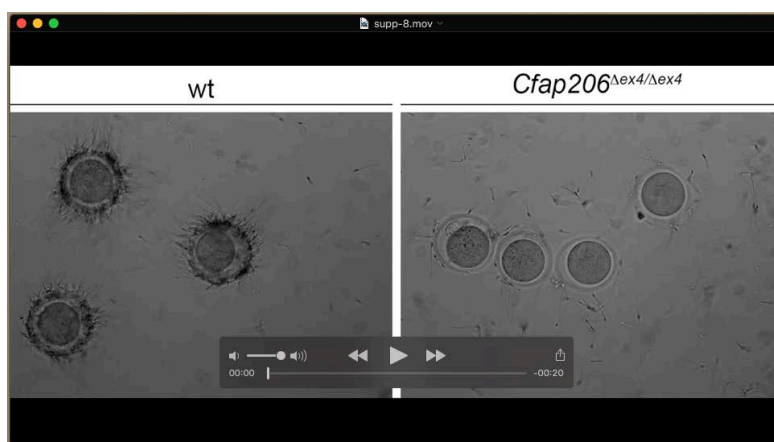

**Movie 7. Motility of wild type and *Cfap206*<sup>Δex4/Δex4</sup> mouse sperm cells in presence of wild type mouse egg cells.**



Representative movies showing sperm movement in presence of egg cells. While wild type sperm move directionally towards and attach to egg cells (left), *Cfap206* <sup>$\Delta ex4/\Delta ex4$</sup>  sperm show abnormal and not directed movement when incubated with egg cells (right). Movies were recorded at a rate of 5.2 fps and played back with 12 fps.

## KEY RESOURCES TABLE

| Reagent or resource                                         | Source            | Identifier                          |
|-------------------------------------------------------------|-------------------|-------------------------------------|
| <b>Antibodies</b>                                           |                   |                                     |
| Mouse $\alpha$ -acetylated $\alpha$ -tubulin; clone 6-11B-1 | Sigma Aldrich     | Cat.#T6793;<br>RRID:AB_477585       |
| Rabbit $\alpha$ -AKAP3                                      | Proteintech       | Cat.#13907-1-AP;<br>RRID:AB_2273887 |
| Mouse $\alpha$ -gamma-Tubulin; clone GTU-88                 | Sigma Aldrich     | Cat.#T5326<br>RRID:AB_532292        |
| Rabbit $\alpha$ -SEPTIN7                                    | IBL international | Cat.#18991;<br>RRID:AB_10705434     |
| Goat $\alpha$ -Mouse-Alexa555                               | Invitrogen        | Cat.#A21424;<br>RRID:AB_141780      |
| Goat $\alpha$ -Mouse-Alexa488                               | Invitrogen        | Cat.#A11029<br>RRID:AB_2534088      |
| Goat $\alpha$ -Rabbit-Alexa555                              | Invitrogen        | Cat.# A21429;<br>RRID:AB_141761     |
| Goat $\alpha$ -Rabbit-Alexa488                              | Invitrogen        | Cat.#11034;<br>RRID:AB_2576217      |
| Donkey $\alpha$ -Rabbit-HRP                                 | Amersham          | Cat.#NA934;<br>RRID:AB_772206       |
| Goat $\alpha$ -Rat-HRP                                      | Amersham          | Cat.#NA935;<br>RRID:AB_772207       |
| Rabbit $\alpha$ -CoxIV [EPR9442(ABC)]                       | Abcam             | Cat.#ab202554                       |
| Rat $\alpha$ -CFAP206 ORF2-2A7 (monoclonal)                 | This paper        | N/A                                 |
| Rat $\alpha$ -CFAP206 ORF2-4F5 (monoclonal)                 | This paper        | N/A                                 |
| Rabbit $\alpha$ -CFAP206 pepI (polyclonal)                  | This paper        | N/A                                 |
| Rabbit $\alpha$ -CFAP206 pepII (polyclonal)                 | This paper        | N/A                                 |
|                                                             |                   |                                     |

| <b>Bacterial and Virus Strains</b>                                              |                          |                                  |
|---------------------------------------------------------------------------------|--------------------------|----------------------------------|
| <i>E.coli</i> XL-1 blue for cloning                                             | Stratagene               |                                  |
| <i>E.coli</i> SCS110 for cloning                                                | Stratagene               |                                  |
| <b>Chemicals, Peptides, and Recombinant Proteins</b>                            |                          |                                  |
| CFAP206 peptide IRLFNDRDSGKGEG (pepI: aa194-207; generation of polyclonal ABs)  | This paper               | N/A                              |
| CFAP206 peptide KEASTQSKREGSSR (pepII: aa576-589; generation of polyclonal ABs) | This paper               | N/A                              |
| CFAP206 peptide PLKEASTQSKREG (ORF2: aa574-586; generation of monoclonal ABs)   | This paper               | N/A                              |
| DAPI                                                                            | AppliChem                | Cat.#A4099                       |
| Lectin PNA-Alexa 488                                                            | Molecular Probes         | Cat.#L-21409;<br>RRID:AB_2315178 |
| Alexa Fluor Plus 405 Phalloidin                                                 | Invitrogen               | A30104                           |
| Taq DNA Polymerase                                                              | Promega                  | M3001                            |
| SulfoLink coupling resin                                                        | Thermo Fisher Scientific | Cat.#20401                       |
| Fluoresbrite Multifluorescent 0.5 micron Microspheres                           | Polysciences             | Cat.#24054                       |
| Halt Protease and Phosphatase Inhibitor Cocktail                                | Thermo Fisher Scientific | Cat.#78440                       |
| Pfu DNA Polymerase                                                              | Promega                  | M7741                            |
| FluoSpheres carboxylate 1.0 µm yellow-green (505/515)                           | Invitrogen               | F8823                            |
| Cas9 protein from <i>Streptococcus pyogenes</i> with NLS                        | PNA Bio                  | CP01                             |
| <b>Critical Commercial Assays</b>                                               |                          |                                  |
| Superscript II Reverse Transcriptase                                            | Invitrogen               | Cat.#18064-022                   |
| TriReagent                                                                      | SigmaAldrich             | Cat.#T9424                       |
| Direct-zol RNA Miniprep Plus                                                    | Zymo Research            | Cat.#R2071                       |
| PAS staining kit                                                                | SigmaAldrich             | Cat.#395B                        |
| DIG RNA labelling kit                                                           | Roche                    | Cat.#11175025910                 |
| PerFectin Transfection Reagent                                                  | Genlantis                | Cat.#T303007                     |
| Pierce Crosslink IP Kit                                                         | Thermo Fisher Scientific | Cat.#26147                       |
| MEGAscript T7 Transcription Kit                                                 | Invitrogen               | AM1354                           |

|                                                   |                        |                 |
|---------------------------------------------------|------------------------|-----------------|
| MEGAclear Transcription Clean-Up Kit              | Invitrogen             | AM1908          |
| <b>Experimental Models: Cell Lines</b>            |                        |                 |
| Hamster: CHO cells                                | ATCC                   | CRL-11268       |
| Mouse: L-cells                                    | ATCC                   | CRL-2648        |
| Mouse: m1MCD3 cells                               | ATCC                   | CRL-2123        |
| <b>Experimental Models: Organisms and Strains</b> |                        |                 |
| Mouse: 129Sv/CD1 hybrids                          | Own colony             | N/A             |
| Mouse: <i>Foxj1<sup>lacZ</sup></i>                | Brody et al., 2000     | MGI:2158221     |
| Mouse: FLPe                                       | Rodríguez et al., 2000 | MGI:2448985     |
| Mouse: ZP3:Cre                                    | De Vries et al., 2000  | MGI:2176187     |
| Mouse: <i>Cfap206<sup>loxP</sup></i>              | This paper             | N/A             |
| Mouse: <i>Cfap206<sup>Δex4</sup></i>              | This paper             | N/A             |
| Rat: LOU/C                                        |                        |                 |
| <i>Xenopus laevis</i>                             | Nasco                  | LM00715/LM00535 |
| <b>Oligonucleotides (5'-3')</b>                   |                        |                 |
| Cfap206-loxP-F1: ATCACGGAGTCAGGGCTAAGTTG          | This paper             | N/A             |
| Cfap206-loxP-R1: GGCAAGCAGTCTACCAACTGAGG          | This paper             | N/A             |
| Cfap206-R1: CCAACCAGCCATACTATTC                   | This paper             | N/A             |
| Cfap206_Ex8for: TCCCAAGTCTTCCCCATCTTCG            | This paper             | N/A             |
| Cfap206_Ex12rev: TGTGTGTATCTGTCTGTGTGCCG          | This paper             | N/A             |
| Cfap206_RTex9for: CGATGGCGTCGTCGTGAAAAG           | This paper             | N/A             |
| Cfap206_RTex13rev: CCCACGAAGGCCAGCTATGAA          | This paper             | N/A             |
| Cfap206_Ex8for: AAAATCTAAGACGGCGGTCCC             | This paper             | N/A             |
| Cfap206_Ex11rev: AGTCAGGAGTTACAAACCCAGGTG         | This paper             | N/A             |
| Hprt_RT_for_ex7: GCTGGTGAAAAGGACCTCT              | This paper             | N/A             |
| Hprt_RT_rev_ex9: CACAGGACTAGAACACCTGC             | This paper             | N/A             |
| Foxj1_RT_for_ex2: CTTCTGCTACTTCCGCCATGC           | This paper             | N/A             |
| Foxj1_RT_rev_ex3: TCCTCCTGGGTCAGCAGTAAGG          | This paper             | N/A             |

|                                                                                                              |                              |                 |
|--------------------------------------------------------------------------------------------------------------|------------------------------|-----------------|
| sgRNA reverse oligo:<br>AAAAGCACCGACTCGGTGCCACTTTTTCAAGTTGATAACGGG<br>CTAGCCTTATTTTAACTTGCTATTTCTAGCTCTAAAAC | Merck                        | N/A             |
| cfap206-sgRNA 1 forward oligo:<br>GCAGCTAATACGACTCACTATAGGCTGTGGGAAAGGTGGAGA<br>GTTTTAGAGCTAGAAATAGCAAG      | Merck                        | N/A             |
| cfap206-sgRNA 2 forward oligo:<br>GCAGCTAATACGACTCACTATAGGCCAGGAATGTGCGGTGA<br>GTTTTAGAGCTAGAAATAGCAAG       | Merck                        | N/A             |
| foxj1-sgRNA forward oligo:<br>GCAGCTAATACGACTCACTATAGGGATACATACCTGCCAGGT<br>GTTTTAGAGCTAGAAATAGCAAG          | Merck<br>Rachev et al., 2019 | N/A             |
| cfap206 target site 1 forward primer:<br>TCCCCACACAGAACTTGGT                                                 | Merck                        | N/A             |
| cfap206 target site 1 reverse primer:<br>AGGATAGCTGGCACTACAATGA                                              | Merck                        | N/A             |
| cfap206 target site 2 forward primer:<br>AGGTTTGAGCGAGCAATGATG                                               | Merck                        | N/A             |
| cfap206 target site 2 reverse primer:<br>CCCCAAAGTAGGCACTCCAA                                                | Merck                        | N/A             |
| <b>Recombinant DNA</b>                                                                                       |                              |                 |
| Cfap206 FANTOM plasmid ( <i>in situ</i> probe generation)                                                    | Kawai and Hayashizaki, 2003  | ZX00119D08      |
| IRAV clone 6306249 (IRAV103H5)- 1700003M02Rik                                                                | ImaGenes                     | IRAVp968H05103D |
| EST clone IMAGp998J0615090Q ( <i>in situ</i> probe generation)                                               | Source BioScience Limited    | 7207016         |
| pcDNA6.2 N-EmGFP-Cfap206 (mouse CFAP206 L expression plasmid)                                                | This paper                   | N/A             |
| pcDNA6.2 N-Flag-Cfap206 (mouse CFAP206 L expression plasmid)                                                 | This paper                   | N/A             |
| pCS2+ Cetn4-RFP                                                                                              | Zhang and Mitchell, 2012     |                 |
| <b>Software and Algorithms</b>                                                                               |                              |                 |
| FIJI (ImageJ)                                                                                                | Schindelin et al., 2012      | RRID:SCR_002285 |
| Prism                                                                                                        | GraphPad                     | RRID:SCR_002798 |
| Imaris                                                                                                       | Bitplane                     | RRID:SCR_007370 |
| MATLAB                                                                                                       | MathWorks                    | RRID:SCR_001622 |
| MacVector                                                                                                    | MacVector                    | RRID:SCR_015700 |

|             |       |                                                                                                                                                             |
|-------------|-------|-------------------------------------------------------------------------------------------------------------------------------------------------------------|
| Photoshop   | Adobe | RRID:SCR_014199                                                                                                                                             |
| Illustrator | Adobe | RRID:SCR_010279                                                                                                                                             |
| Chi-square  |       | <a href="http://www.physics.csbsju.edu/stats/contingency_NROW_NCOLUMN_form.html">http://www.physics.csbsju.edu/stats/contingency_NROW_NCOLUMN_form.html</a> |
| Other       |       |                                                                                                                                                             |
|             |       |                                                                                                                                                             |

Table S11. Potential interaction partners of CFAP206 identified by mass spectrometry. CFAP206 (C6orf165 homolog) is marked in yellow

[Click here to Download Table S11](#)
